# Supplementary material for: Ingestion of High Molecular Weight Carbohydrate Enhances Subsequent Repeated Maximal Power: A Randomized Controlled Trial
Source: PLOS journal article supplement (doi:10.1371/journal.pone.0163009), 2016-09-16
Supplement: S2 (10.1371/journal.pone.0163009.s002) [file journal.pone.0163009.s002]

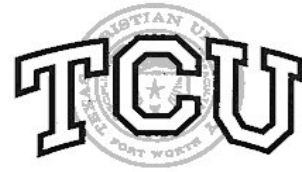

## TCU INSTITUTIONAL REVIEW BOARD

### REQUEST FOR AMENDMENT/MODIFICATION TO PROTOCOL

---

The TCU Institutional Review Board (IRB) is responsible for protecting the welfare and rights of individuals who are subjects of any research conducted by faculty, staff, or students at TCU. Approval by the IRB must be obtained prior to any amendment/modification to the original protocol.

**Date:** 03.17.14

1. **Project Title:** Comparative effects of post-exercise ingestion of a high or low molecular weight wolution on resistance exercise performance

**IRB Initial Approval Number and Date:** 1401-45-1401 January 31<sup>st</sup>, 2014

2. **List the name and Faculty/Students/Staff status of the person(s) conducting the research.**

a. **Principal Investigator:** Jonathan M. Oliver

b. **Department:** Kinesiology

c. **Others:** Joel Mitchell, Melody Phillips, Leighsa Brace, Torie Johnson

3. **Project Period:** 01.22.14-01.22.15

4. **Funding**

a. **Agency:**

b. **Amount Awarded:**

5. **Summarize the amendment/modifications.**

Compensation is not being offered

6. **Does this amendment/ modification impact the level of risk? No**  
**If yes, how?**

**Preparer's Name** Jonathan M. Oliver

Printed

**Date:** 03.17.14

**TCU Box** 297730

**Ext.** 5623

**Email Address:** jonathan.oliver@tcu.edu
